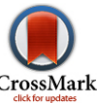

## Correction

# Correction: Circular RNA Is Expressed across the Eukaryotic Tree of Life

The *PLOS ONE* Staff

## Notice of Republication

This article was republished on March 20, 2014, to correct the ordering of figures. The publisher apologizes for the error. Please download this article again to view the correct version. The originally published, uncorrected article and the republished, corrected article are provided here for reference.

## Supporting Information

**File S1.** Originally published, uncorrected article.

**File S2.** Republished, corrected article.

## Reference

1. Wang PL, Bao Y, Yee M-C, Barrett SP, Hogan GJ, et al. (2014) Circular RNA Is Expressed across the Eukaryotic Tree of Life. *PLoS ONE* 9(3): e90859. doi:10.1371/journal.pone.0090859

---

**Citation:** The *PLOS ONE* Staff (2014) Correction: Circular RNA Is Expressed across the Eukaryotic Tree of Life. *PLoS ONE* 9(4): e95116. doi:10.1371/journal.pone.0095116

**Published:** April 8, 2014

**Copyright:** © 2014 The *PLOS ONE* Staff. This is an open-access article distributed under the terms of the Creative Commons Attribution License, which permits unrestricted use, distribution, and reproduction in any medium, provided the original author and source are credited.
